# Supplementary material for: Marine algal flora of Graciosa Island, Azores
Source: Biodivers Data J. 2020 Oct 2;8:e57201. doi: 10.3897/BDJ.8.e57201 (PMC7547050; doi:10.3897/BDJ.8.e57201)
Supplement: Supplementary material 1 — DP-GRA-id_14140_normalized.csv [file bdj-08-e57201-s001.csv]

occurrenceId	verbatimScientificName	scientificName	key	matchType	confidence	status	rank	kingdom	phylum	class	order	family	genus	species
	Chondracanthus teedei (Mertens ex Roth) Kützing	Chondracanthus teedii (Roth) Kütz.	5279143	FUZZY	100	SYNONYM	SPECIES	Plantae	Rhodophyta	Florideophyceae	Gigartinales	Gigartinaceae	Chondracanthus	Chondracanthus teedei
	Cladostephus spongiosum (Hudson) C. Agardh	Cladostephus spongiosus (Huds.) C.Agardh	3200756	FUZZY	100	ACCEPTED	SPECIES	Chromista	Ochrophyta	Phaeophyceae	Sphacelariales	Cladostephaceae	Cladostephus	Cladostephus spongiosus
	Corallina ferreyrae E.Y.Dawson	Corallina ferreyrai E.Y.Dawson et al.	5730171	FUZZY	95	ACCEPTED	SPECIES	Plantae	Rhodophyta	Florideophyceae	Corallinales	Corallinaceae	Corallina	Corallina ferreyrai
	Antithamnion diminuatum Wollaston	Antithamnion Nägeli, 1847	2657411	HIGHERRANK	96	ACCEPTED	GENUS	Plantae	Rhodophyta	Florideophyceae	Ceramiales	Ceramiaceae	Antithamnion
	Botryocladia macaronesica Afonso-Carrillo	Botryocladia (J.Agardh) Kylin, 1931	2663148	HIGHERRANK	91	ACCEPTED	GENUS	Plantae	Rhodophyta	Florideophyceae	Rhodymeniales	Rhodymeniaceae	Botryocladia
	Carradoriella denudata (Dillwyn) A.M.Savoie & G.W.Saunders	Carradoriella P.C.Silva, 1996	2659269	HIGHERRANK	96	SYNONYM	GENUS	Plantae	Rhodophyta	Florideophyceae	Ceramiales	Rhodomelaceae	Polysiphonia
	Carradoriella elongata (Hudson) A.M.Savoie & G.W.Saunders	Carradoriella P.C.Silva, 1996	2659269	HIGHERRANK	96	SYNONYM	GENUS	Plantae	Rhodophyta	Florideophyceae	Ceramiales	Rhodomelaceae	Polysiphonia
	Codium elisabethiae O.C.Schmidt	Codium Stackhouse, 1797	2642664	HIGHERRANK	96	ACCEPTED	GENUS	Plantae	Chlorophyta	Ulvophyceae	Bryopsidales	Codiaceae	Codium
	Cryptonemia palmetta (S.G.Gmelin) Woelkering	Cryptonemia J.Agardh, 1842	2656619	HIGHERRANK	91	ACCEPTED	GENUS	Plantae	Rhodophyta	Florideophyceae	Halymeniales	Halymeniaceae	Cryptonemia
	Gaillona hookeri (Dillwyn) Athanasiadis	Gaillona Bonnemaison, 1828	4890364	HIGHERRANK	94	DOUBTFUL	GENUS	Plantae	Rhodophyta	Florideophyceae	Ceramiales	Callithamniaceae	Gaillona
	Gelidium arbuscula Bory ex Børgesen	Gelidium J.V.Lamour.	9460134	HIGHERRANK	96	ACCEPTED	GENUS	Plantae	Rhodophyta	Florideophyceae	Gelidiales	Gelidiaceae	Gelidium
	Gelidium microdon Kützing	Gelidium J.V.Lamour.	9460134	HIGHERRANK	96	ACCEPTED	GENUS	Plantae	Rhodophyta	Florideophyceae	Gelidiales	Gelidiaceae	Gelidium
	Hydroclathrus tilesii (Endlicher) Santiañez & Wynne	Hydroclathrus Bory de Saint-Vincent, 1825	3198483	HIGHERRANK	95	ACCEPTED	GENUS	Chromista	Ochrophyta	Phaeophyceae	Scytosiphonales	Scytosiphonaceae	Hydroclathrus
	Hypnea arbuscula P.J.L.Dangeard	Hypnea J.V.Lamouroux, 1813	2668293	HIGHERRANK	96	ACCEPTED	GENUS	Plantae	Rhodophyta	Florideophyceae	Gigartinales	Cystocloniaceae	Hypnea
	Hypoglossum heterocystideum (J.Agardh) J.Agardh	Hypoglossum Kützing, 1843	2661571	HIGHERRANK	96	ACCEPTED	GENUS	Plantae	Rhodophyta	Florideophyceae	Ceramiales	Delesseriaceae	Hypoglossum
	Jania pedunculata var. adhaerens (J.V.Lamouroux) A.S.Harvey	Jania pedunculata J.V.Lamour.	5276186	HIGHERRANK	96	ACCEPTED	SPECIES	Plantae	Rhodophyta	Florideophyceae	Corallinales	Corallinaceae	Jania	Jania pedunculata
	Laurencia minuta Vandermeulen	Laurencia J.V.Lamouroux, 1813	2660953	HIGHERRANK	91	ACCEPTED	GENUS	Plantae	Rhodophyta	Florideophyceae	Ceramiales	Rhodomelaceae	Laurencia
	Leptosiphonia brodiei (Dillwyn) A.M.Savoie & G.W.Saunders	Leptosiphonia Kylin, 1956	2660186	HIGHERRANK	96	ACCEPTED	GENUS	Plantae	Rhodophyta	Florideophyceae	Ceramiales	Rhodomelaceae	Leptosiphonia
	Lychaete pellucida (Hudson) M.J.Wynne	Lychaete J.Agardh, 1846	2644499	HIGHERRANK	94	DOUBTFUL	GENUS	Plantae	Chlorophyta	Ulvophyceae	Cladophorales	Cladophoraceae	Lychaete
	Papenfussiella kuromo (Yendo) Inagaki	Papenfussiella Kylin, 1940	3199329	HIGHERRANK	96	ACCEPTED	GENUS	Chromista	Ochrophyta	Phaeophyceae	Ectocarpales	Chordariaceae	Papenfussiella
	Petalonia binghamiae (J.Agardh) K.L.Vinogradova	Petalonia Derbès & Solier, 1850	3197913	HIGHERRANK	96	ACCEPTED	GENUS	Chromista	Ochrophyta	Phaeophyceae	Scytosiphonales	Scytosiphonaceae	Petalonia
	Phyllophora gelidioides P.Crouan & H.Crouan ex Karsakoff	Phyllophora Greville, 1830	2667343	HIGHERRANK	96	ACCEPTED	GENUS	Plantae	Rhodophyta	Florideophyceae	Gigartinales	Phyllophoraceae	Phyllophora
	Predaea feldmannii subsp. azorica Gabriel	Predaea feldmannii Børgesen	2667440	HIGHERRANK	100	ACCEPTED	SPECIES	Plantae	Rhodophyta	Florideophyceae	Nemastomatales	Nemastomataceae	Predaea	Predaea feldmannii
	Treptacantha abies-marina (S.G.Gmelin) Kützing	Chromista	4	HIGHERRANK	99	ACCEPTED	KINGDOM	Chromista
	Vertebrata hypnoides (Welwitsch) Kuntze	Vertebrata S.F.Gray, 1821	2660342	HIGHERRANK	96	ACCEPTED	GENUS	Plantae	Rhodophyta	Florideophyceae	Ceramiales	Rhodomelaceae	Vertebrata
	Vertebrata reptabunda (Suhr) Díaz-Tapia & Maggs	Vertebrata S.F.Gray, 1821	2660342	HIGHERRANK	96	ACCEPTED	GENUS	Plantae	Rhodophyta	Florideophyceae	Ceramiales	Rhodomelaceae	Vertebrata
	Vertebrata tripinnata (Harvey) Kuntze	Vertebrata S.F.Gray, 1821	2660342	HIGHERRANK	96	ACCEPTED	GENUS	Plantae	Rhodophyta	Florideophyceae	Ceramiales	Rhodomelaceae	Vertebrata
	Xiphosiphonia pinnulata (Kützing) Savoie & G.W.Saunders	Xiphosiphonia Savoie & G.W.Saunders, 2016	9364476	HIGHERRANK	94	DOUBTFUL	GENUS	Plantae	Rhodophyta	Florideophyceae	Ceramiales	Rhodomelaceae	Xiphosiphonia
